# Supplementary material for: Preparation of ordered nanohole array structures by anodization of prepatterned Cu, Zn, and Ni
Source: Royal Society of Chemistry journal article supplement (doi:10.1039/d2ra00279e), 2022-01-01
Supplement: d2ra00279e1.pdf [file d2ra00279e1.pdf]

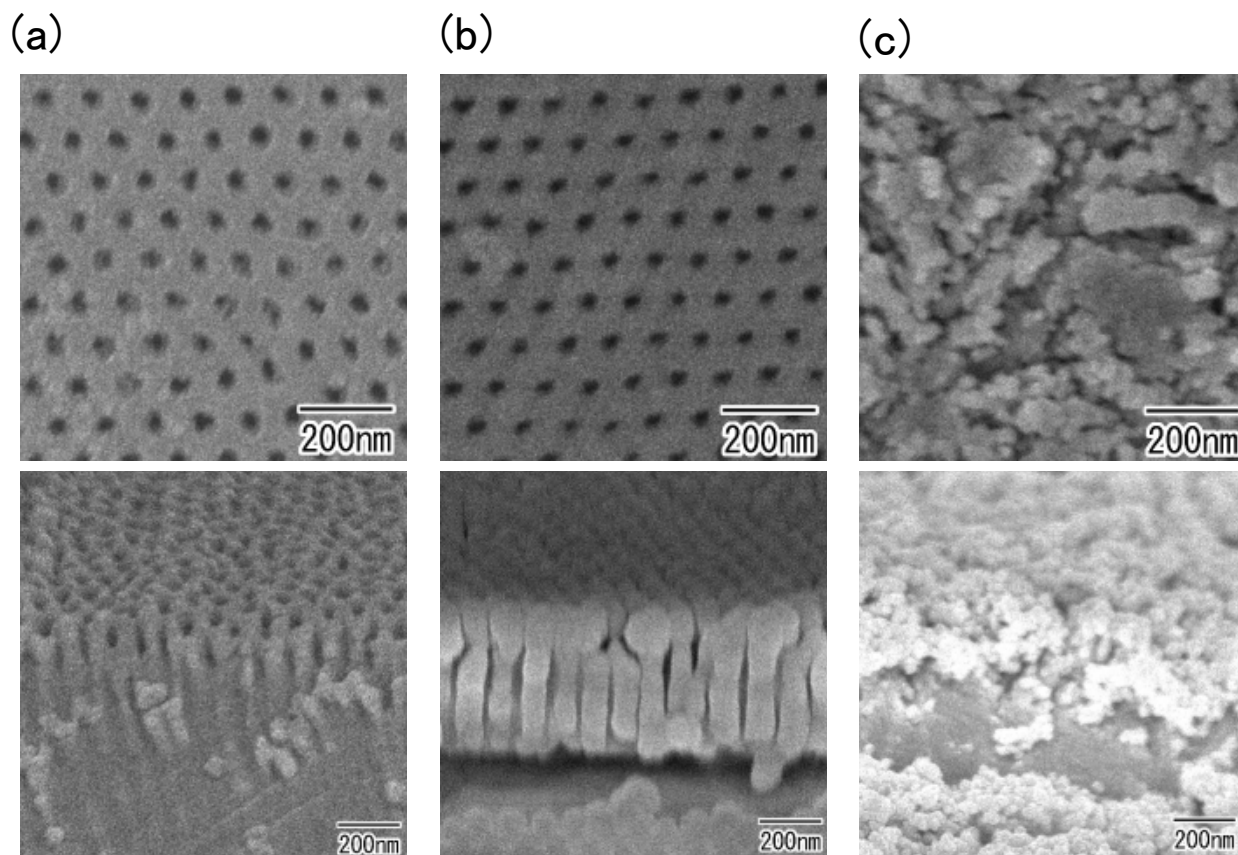

## Figure S1

Surface and cross-sectional SEM images of anodized samples. Anodization of prepatterned Cu substrates was performed at 20 V in electrolytes containing (a) 0, (b) 0.03, and (c) 0.15 M  $\text{NH}_4\text{F}$ . The concentration of KOH was fixed at 0.03 M.
